# Supplementary material for: CircCamsap1 is dispensable for male fertility in mice
Source: PeerJ. 2024 May 21;12:e17399. doi: 10.7717/peerj.17399 (PMC11122046; doi:10.7717/peerj.17399)
Supplement: Supplemental Information 2 [file peerj-12-17399-s002.xlsx]

## Sheet: Figure 1
Figure 1
Figure 1c
Relative mRNA levels of circRsrc1
	Biological Replicate 1	Biological Replicate 2	Biological Replicate 3
heart	0.052244	0.046158	0.124064
liver	0.011145	0.010714	0.040935
spleen	0.166683	0.165453	0.144763
lung	0.060386	0.05473	0.18008
Kidney	0.045105	0.04115	0.103516
Fat	0.148956	0.145764	0.074463
Muscle	0.0265	0.037563	0.167481
Brain	0.313886	0.277895	0.342407
Testis	1	1	1
Figure 1d
Relative mRNA levels of Rsrc1
	Biological Replicate 1	Biological Replicate 2	Biological Replicate 3
heart	0.012278	0.01192	0.029989
liver	0.004562	0.004143	0.008973
spleen	0.018857	0.042683	0.022007
lung	0.007407	0.007991	0.026032
Kidney	0.01101	0.010492	0.014044
Fat	0.019166	0.016789	0.019216
Muscle	0.013504	0.014567	0.04784
Brain	0.11967	0.121587	0.104987
Testis	1	1	1
Figure 1e
Relative mRNA levels of circRsrc1 in mouse testis
	Biological Replicate 1	Biological Replicate 2	Biological Replicate 3
7d	1	1	1
12d	1.31814	1.3545	1.0815
14d	1.79455	1.91875	1.52841
16d	1.81827	1.84525	1.49286
18d	2.61057	2.2944	2.10286
21d	5.7189	4.50886	4.35145
28d	6.04	6.40319	5.66737
56d	7.56723	6.12557	5.90287
Figure 1f
Relative mRNA levels of Rsrc1 in mouse testis
	Biological Replicate 1	Biological Replicate 2	Biological Replicate 3
7d	1	1	1
12d	1.09875	1.10285	1.12774
14d	1.31359	1.30144	1.37706
16d	1.82851	1.65629	2.02508
18d	2.82623	2.26521	2.6495
21d	9.78493	11.3135	11.7081
28d	15.4513	14.0111	15.0947
56d	17.8407	16.6737	17.1876

## Sheet: Figure 2
Figure 2
Figure 2c
Relative mRNA levels normalized to 18S
		Biological Replicate 1	Biological Replicate 2	Biological Replicate 3
Camsap1	circCamsap1+/+	1	1	1
	circCamsap1-/-	1.03023	0.870897	1.07611
circCamsap1	circCamsap1+/+	1	1	1
	circCamsap1-/-	0.0735588	0.114531	0.0599829

## Sheet: Figure 3
Figure 3
Figure 3a
Pups per litter
	Biological Replicate 1	Biological Replicate 2	Biological Replicate 3	Biological Replicate 4	Biological Replicate 5	Biological Replicate 6	Biological Replicate 7	Biological Replicate 8	Biological Replicate 9
circCamsap1+/+	8	11	10	9	8	7	8	9	7
circCamsap1-/-	7	7	8	7	11	9	10	10	8
Figure 3b
Testis Weight (mg)
	Biological Replicate 1	Biological Replicate 2	Biological Replicate 3
circCamsap1+/+	88.3	92.1	89.2
circCamsap1-/-	92.5	87.9	89.4
Figure 3c
Body Weight (g)
	Biological Replicate 1	Biological Replicate 2	Biological Replicate 3
circCamsap1+/+	27.6	31.2	29.2
circCamsap1-/-	30.6	28.4	27.9
Figure 3d
Testis/Body Weight (mg/g)
	Biological Replicate 1	Biological Replicate 2	Biological Replicate 3
circCamsap1+/+	3.19928	2.95192	3.05479
circCamsap1-/-	3.02288	3.09507	3.2043
Figure 3h
% of spermatocytes
		Biological Replicate 1	Biological Replicate 2	Biological Replicate 3
Leptotene	circCamsap1+/+	13.242	9.3863	9.5745
	circCamsap1-/-	8.6207	7.5472	13.9706
Zygotene	circCamsap1+/+	12.785	10.8303	8.7766
	circCamsap1-/-	10.3448	10.0629	13.9706
Pachytene	circCamsap1+/+	45.662	45.1264	48.9362
	circCamsap1-/-	51.7241	50.3145	52.2059
Diplotene	circCamsap1+/+	28.311	34.296	32.7128
	circCamsap1-/-	29.3103	32.0755	20.5882

## Sheet: Figure 4
Figure 4
Figure 4c
Sperm count (x 10^6 per ml)
	Biological Replicate 1	Biological Replicate 2	Biological Replicate 3
circCamsap1+/+	32.27	46.07	44.68
circCamsap1-/-	38.27	36.39	30.83
Figure 4d
Sperm motile (%)
	Biological Replicate 1	Biological Replicate 2	Biological Replicate 3
circCamsap1+/+	76	78.2	80
circCamsap1-/-	79.1	78.6	70.8
Figure 4e
Sperm progressive (%)
	Biological Replicate 1	Biological Replicate 2	Biological Replicate 3
circCamsap1+/+	22.4	23.9	23.5
circCamsap1-/-	26.2	27.4	23.6
