# Supplementary material for: CircCamsap1 is dispensable for male fertility in mice
Source: PeerJ. 2024 May 21;12:e17399. doi: 10.7717/peerj.17399 (PMC11122046; doi:10.7717/peerj.17399)
Supplement: Supplemental Information 4 [file peerj-12-17399-s004.xls]

## Sheet: Sheet1
ITEM TO CHECK	IMPORTANCE	CHECKLIST
EXPERIMENTAL DESIGN
Definition of experimental and control groups	E	Line 100
Number within each group	E	Line 89-148
Assay carried out by core lab or investigator's lab?	D	NA
Acknowledgement of authors' contributions	D	Line 285-295
SAMPLE
Description	E	Line 89-148
Volume/mass of sample processed	D	Line 89-148
Microdissection or macrodissection	E	Line 89-148
Processing procedure	E	NA
If frozen - how and how quickly?	E	NA
If fixed - with what, how quickly?	E	Line 122-128
Sample storage conditions and duration (especially for FFPE samples)	E	NA
NUCLEIC ACID EXTRACTION
Procedure and/or instrumentation	E	Line 89-148
Name of kit and details of any modifications	E	Line 89-148
Source of additional reagents used	D	NA
Details of DNase or RNAse treatment	E	Line 106-115
Contamination assessment (DNA or RNA)	E	Line 106-115
Nucleic acid quantification	E	Line 106-115
Instrument and method	E	Line 106-115
Purity (A260/A280)	D	Line 106-115
Yield	D	Line 106-115
RNA integrity method/instrument	E	NA
RIN/RQI or Cq of 3' and 5' transcripts	E	NA
Electrophoresis traces	D	NA
Inhibition testing (Cq dilutions, spike or other)	E	NA
REVERSE TRANSCRIPTION
Complete reaction conditions	E	Line 106-115
Amount of RNA and reaction volume	E	Line 106-115
Priming oligonucleotide (if using GSP) and concentration	E	Line 106-115
Reverse transcriptase and concentration	E	Line 106-115
Temperature and time	E	Line 106-115
Manufacturer of reagents and catalogue numbers	D	Line 106-115
Cqs with and without RT	D*	NA
Storage conditions of cDNA	D	NA
qPCR TARGET INFORMATION
If multiplex, efficiency and LOD of each assay.	E	NA
Sequence accession number	E	NA
Location of amplicon	D	NA
Amplicon length	E	Line 115
In silico specificity screen (BLAST, etc)	E	NA
Pseudogenes, retropseudogenes or other homologs?	D	NA
Sequence alignment	D	NA
Secondary structure analysis of amplicon	D	NA
Location of each primer by exon or intron (if applicable)	E	NA
What splice variants are targeted?	E	NA
qPCR OLIGONUCLEOTIDES
Primer sequences	E	Line 115
RTPrimerDB Identification Number	D	NA
Probe sequences	D**	NA
Location and identity of any modifications	E	NA
Manufacturer of oligonucleotides	D	NA
Purification method	D	NA
qPCR PROTOCOL
Complete reaction conditions	E	Line 106-115
Reaction volume and amount of cDNA/DNA	E	Line 106-115
Primer, (probe), Mg++ and dNTP concentrations	E	Line 106-115
Polymerase identity and concentration	E	Line 106-115
Buffer/kit identity and manufacturer	E	Line 106-115
Exact chemical constitution of the buffer	D	NA
Additives (SYBR Green I, DMSO, etc.)	E	Line 106-115
Manufacturer of plates/tubes and catalog number	D	NA
Complete thermocycling parameters	E	Line 106-115
Reaction setup (manual/robotic)	D	NA
Manufacturer of qPCR instrument	E	Line 106-115
qPCR VALIDATION
Evidence of optimisation (from gradients)	D	NA
Specificity (gel, sequence, melt, or digest)	E	NA
For SYBR Green I, Cq of the NTC	E	NA
Standard curves with slope and y-intercept	E	NA
PCR efficiency calculated from slope	E	NA
Confidence interval for PCR efficiency or standard error	D	NA
r2 of standard curve	E	NA
Linear dynamic range	E	NA
Cq variation at lower limit	E	NA
Confidence intervals throughout range	D	NA
Evidence for limit of detection	E	NA
If multiplex, efficiency and LOD of each assay.	E	NA
DATA ANALYSIS
qPCR analysis program (source, version)	E	Line 143-148
Cq method determination	E	Line 143-148
Outlier identification and disposition	E	Line 143-148
Results of NTCs	E	Line 143-148
Justification of number and choice of reference genes	E	Line 143-148
Description of normalisation method	E	Line 143-148
Number and concordance of biological replicates	D	NA
Number and stage (RT or qPCR) of technical replicates	E	Line 143-148
Repeatability (intra-assay variation)	E	Line 143-148
Reproducibility (inter-assay variation, %CV)	D	NA
Power analysis	D	NA
Statistical methods for result significance	E	Line 143-148
Software (source, version)	E	Line 143-148
Cq or raw data submission using RDML	D	NA
Table 1. MIQE checklist for authors, reviewers and editors. All essential information (E) must be submitted with the manuscript. Desirable
information (D) should be submitted if available. If using primers obtained from RTPrimerDB, information on qPCR target, oligonucleotides,
protocols and validation is available from that source.
*: Assessing the absence of DNA using a no RT assay is essential when first extracting RNA. Once the sample has been validated as
RDNA-free, inclusion of a no-RT control is desirable, but no longer essential.
**: Disclosure of the probe sequence is highly desirable and strongly encouraged. However, since not all commercial pre-designed assay
vendors provide this information, it cannot be an essential requirement. Use of such assays is advised against.
