# Supplementary material for: CircCamsap1 is dispensable for male fertility in mice
Source: PeerJ journal article supplement (doi:10.7717/peerj.17399), 2024-05-21
Supplement: TableS1.pdf [file TableS1.pdf]

**Table S1. Primers used in PCR,RT-PCR and RT-qPCR**

| <b>Primer name</b>      | <b>Primer sequence(5'-3')</b> | <b>Expected product size (bp)</b> |
|-------------------------|-------------------------------|-----------------------------------|
| Convergent-F            | CTGACCTCAGCCAGGCACCTATT       | 291                               |
| Convergent-R            | GCTCTCGCCGATAACGGACCTT        |                                   |
| Divergent-F             | TCTGGATCAATAAGACAACATCCCTG    | 124                               |
| Divergent-R             | ACGGCAATACAGCTCACTGGACAG      |                                   |
| circCamsap1/--5+3 arm-F | GGTTGCTATGTTCTCAGAGGCTAT      | 1208                              |
| circCamsap1/--5+3 arm-R | CTCAGGCTACATTGCTTCCTTACT      |                                   |
| CacircCamsap1/--5 arm-F | GCACTCAGCCAGAATCGGTTG         | 1061                              |
| circCamsap1/--5 arm-R   | CCAGCACAGCAGCAATCTCAG         |                                   |
| circCamsap1/--3 arm-F   | ATGGTGGTGAAGTGGAGATATAGG      | 1303                              |
| circCamsap1/--3 arm-R   | GAAGCAGGAAGGAAGGTGGAA         |                                   |
| circCamsap1-RT-(Q)pcr-F | ATGGTGGATGCCCTGATGATGG        | 214                               |
| circCamsap1-RT-(Q)pcr-R | GGCTTAATGTGCTCCTGCTCATACT     |                                   |
| Camsap1-RT-qpcr-F       | CTGACCTCAGCCAGGCACCTATT       | 291                               |
| Camsap1-RT-qpcr-R       | GCTCTCGCCGATAACGGACCTT        |                                   |
| 18S-F                   | TAACGAACGAGACTCTGGCAT         | 138                               |
| 18S-R                   | CGGACATCTAAGGGCATCACAG        |                                   |
