# Supplementary material for: CircCamsap1 is dispensable for male fertility in mice
Source: PeerJ journal article supplement (doi:10.7717/peerj.17399), 2024-05-21

Figure 1b

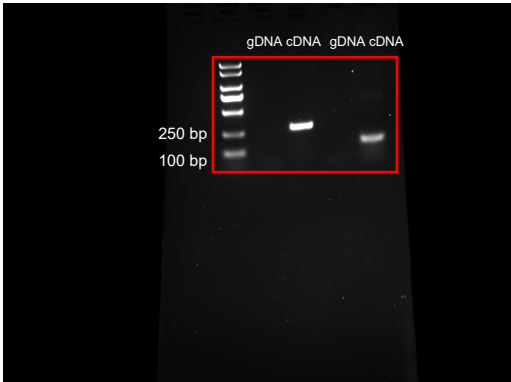

Figure 2b

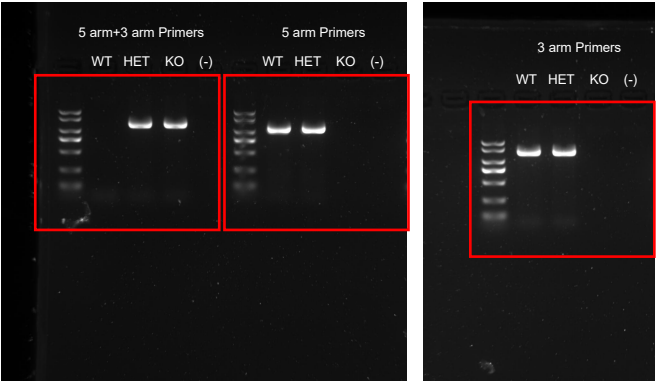

Figure 2c

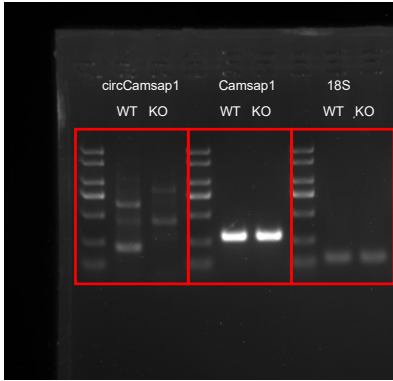

Supplement: Uncropped_gels.pdf [file Uncropped_gels.pdf]
